# Supplementary figures and images for: Genome-Wide Association Study of Root and Shoot Related Traits in Spring Soybean (Glycine max L.) at Seedling Stages Using SLAF-Seq
Source: Frontiers journal article supplement (doi:10.3389/fpls.2021.568995), 2021-07-28

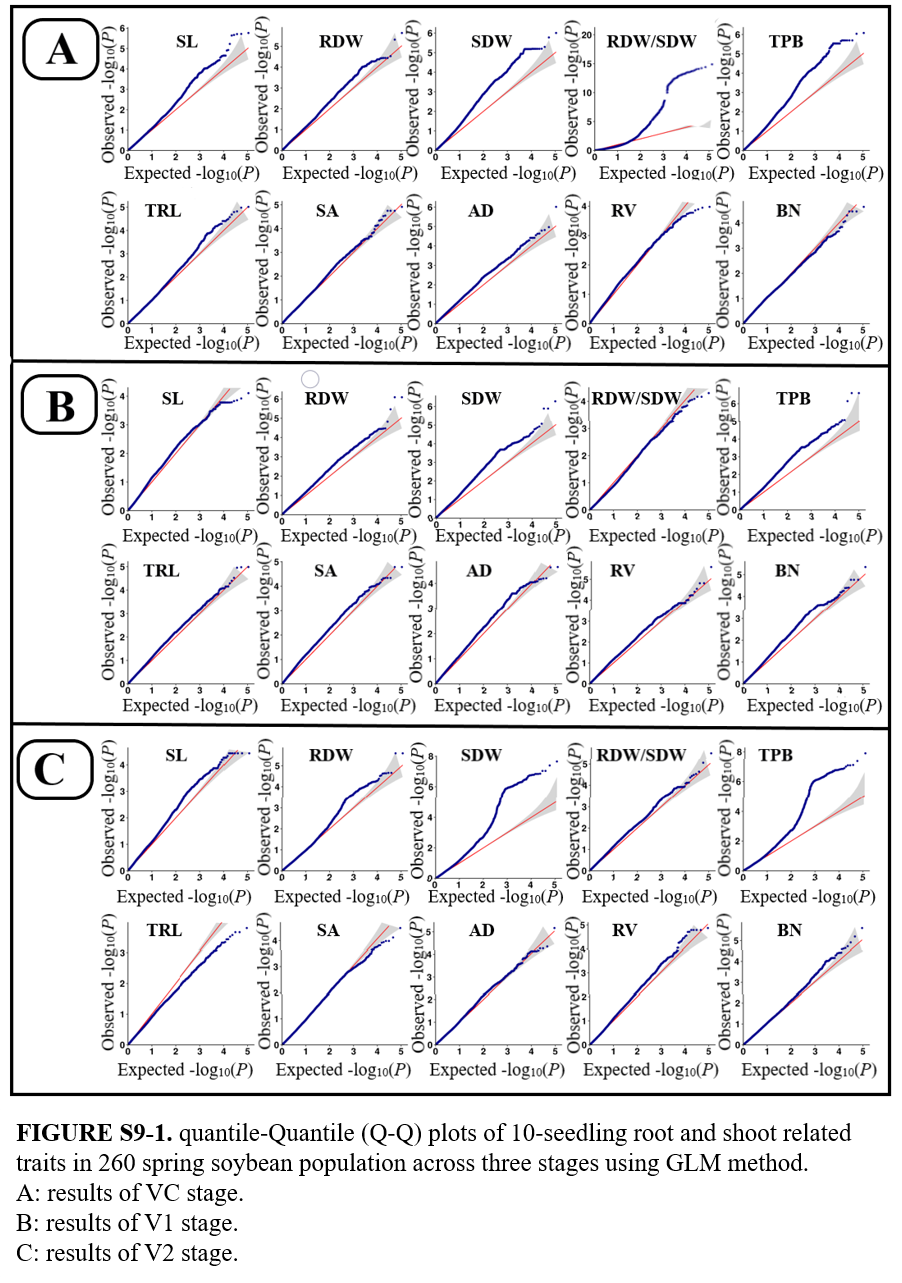

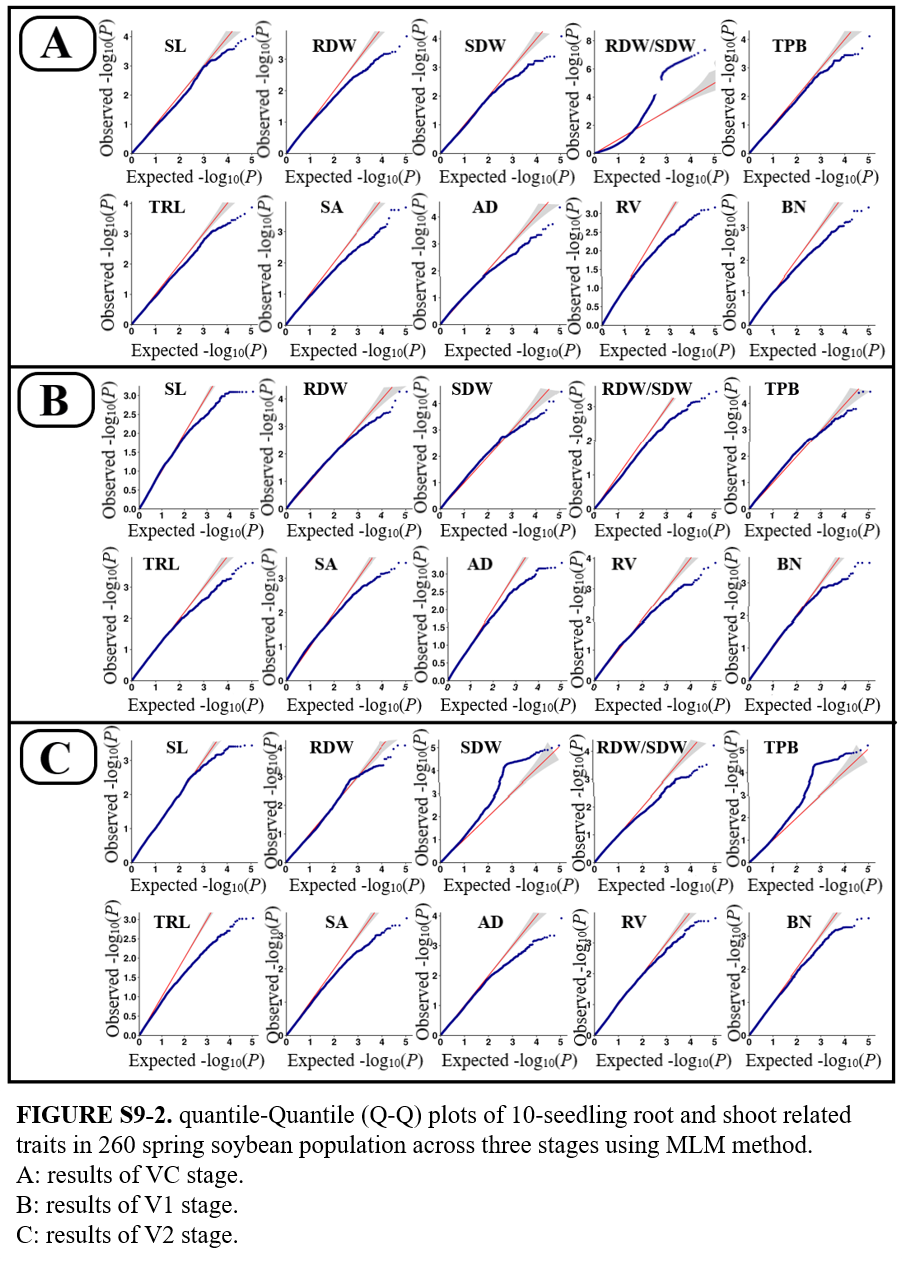

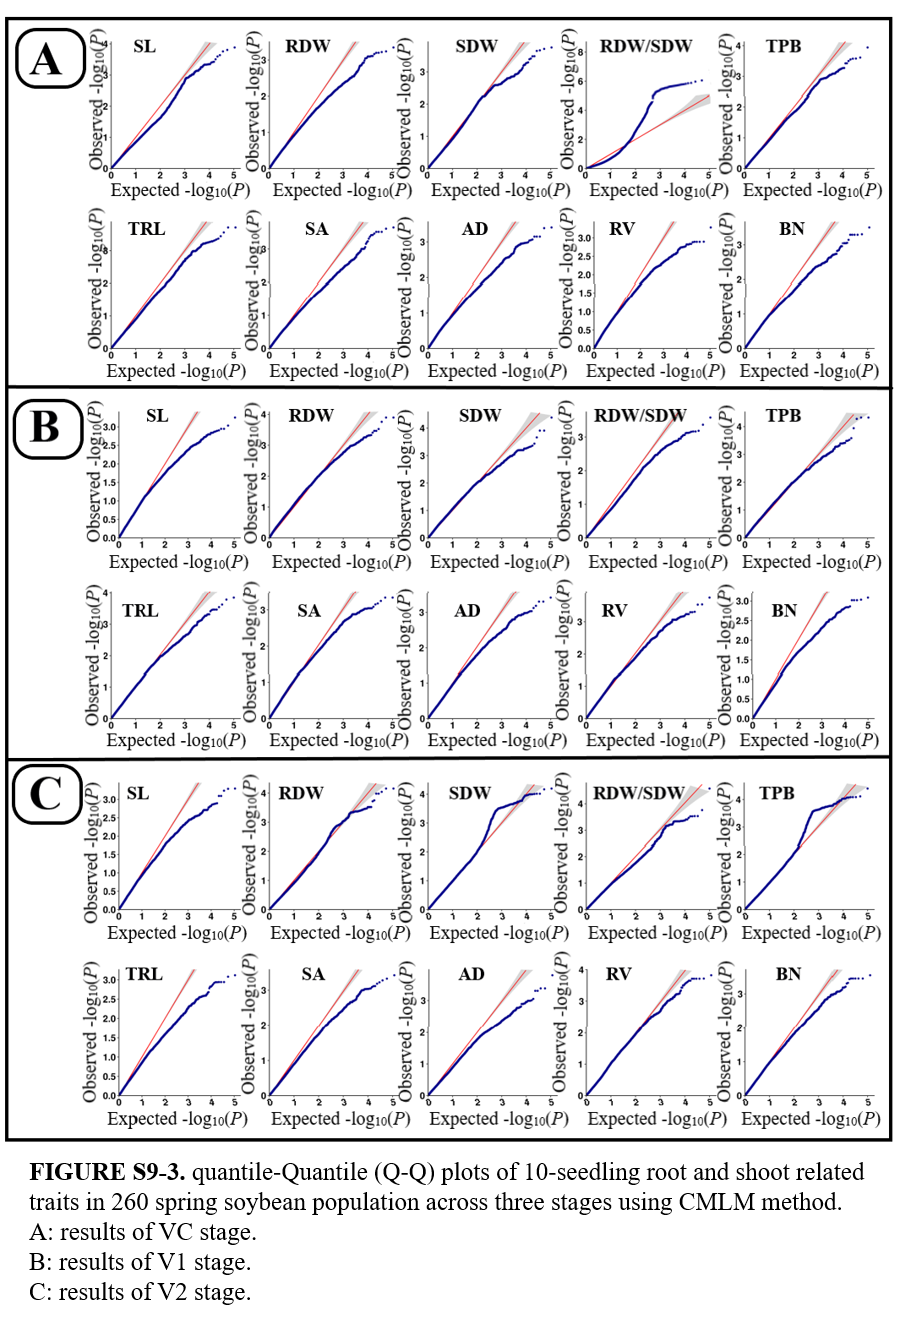

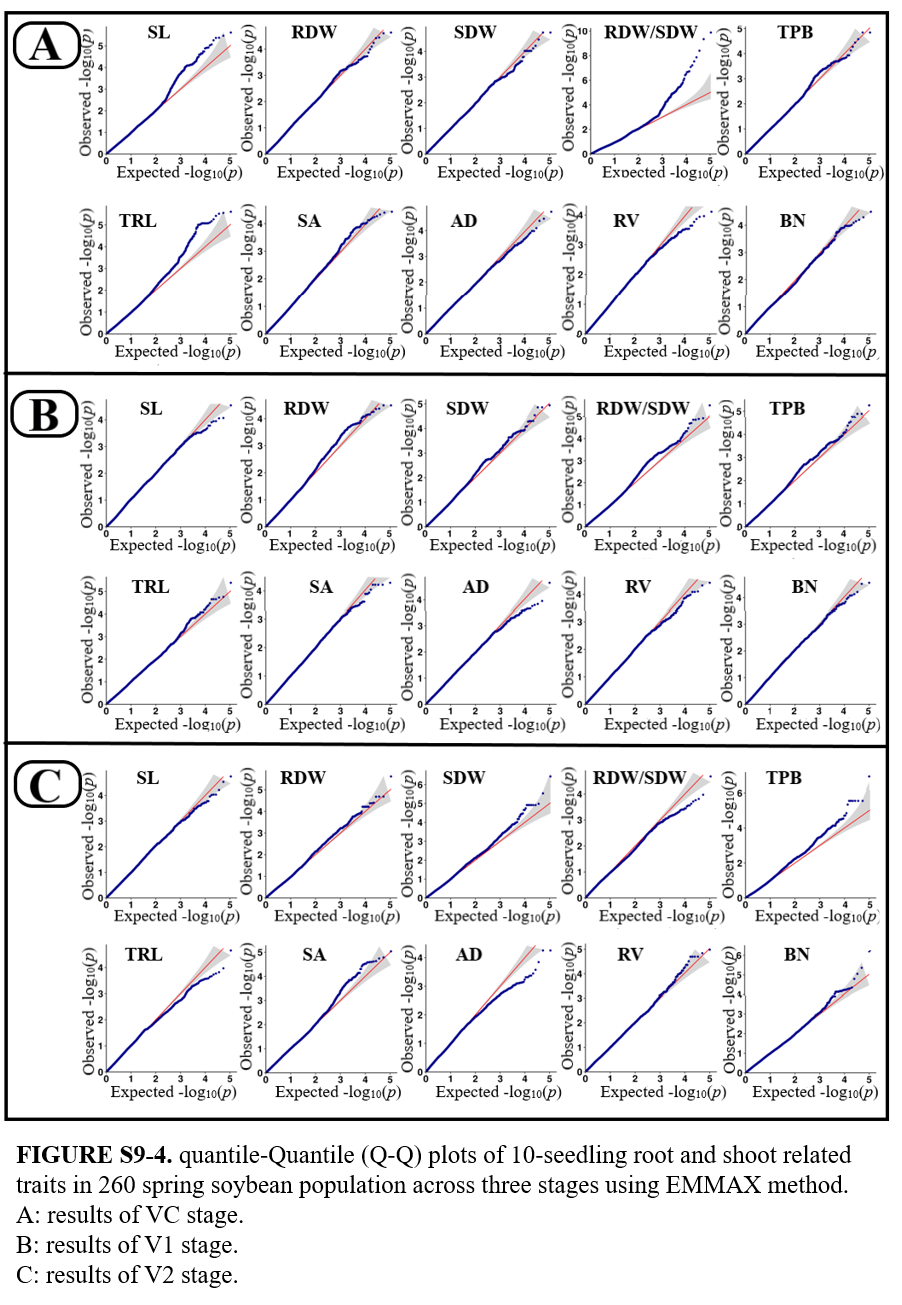

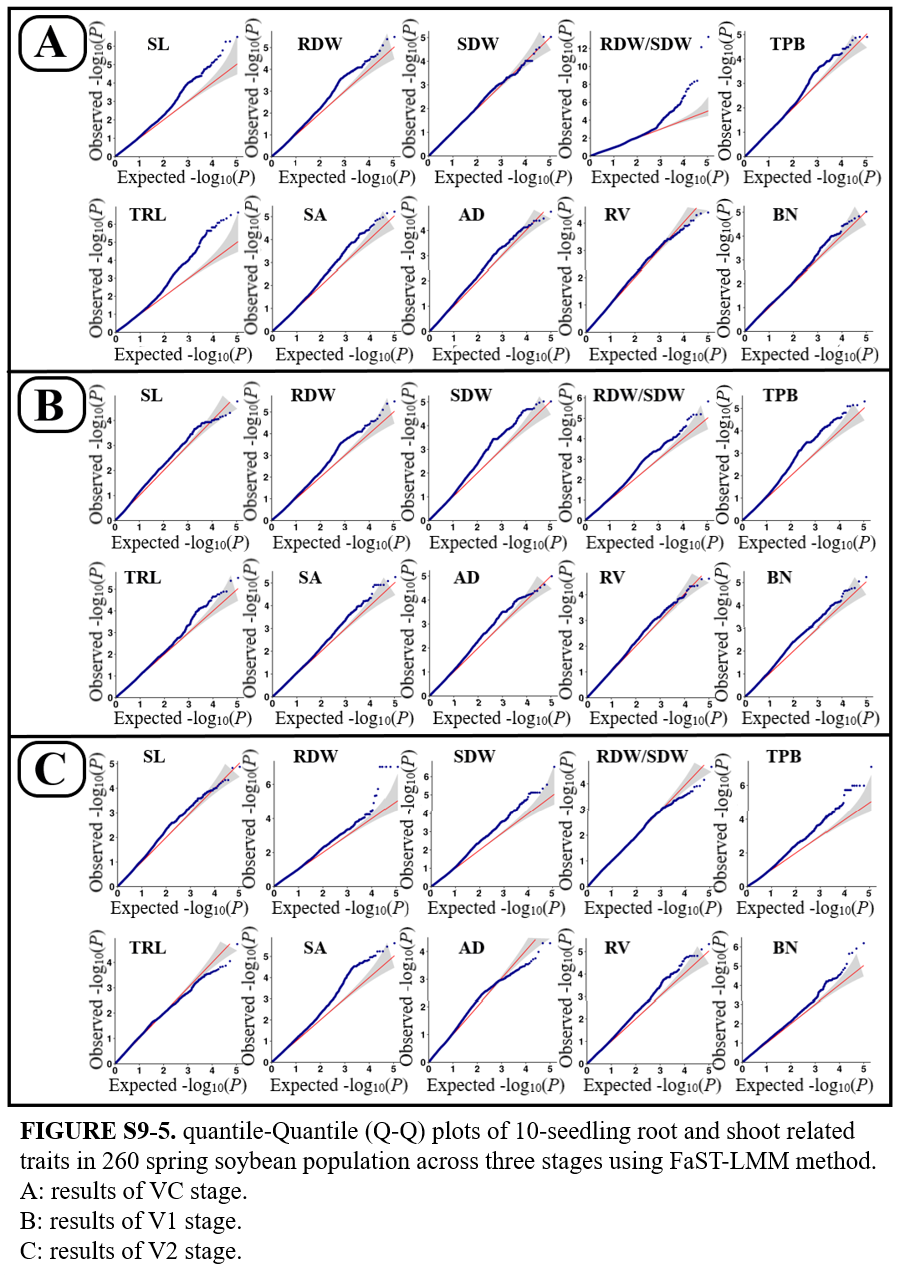

Supplement: Data_Sheet_1.ZIP [file Data_Sheet_1.ZIP]
